# Supplementary material
Source: ML conference proceedings conference paper supplement (https://openreview.net/forum?id=Ua9Vi0QqwD4)
Supplement: supplementary_material [file attachment]

# Supplementary Material: Learning to dehaze with polarization

Chu Zhou<sup>1</sup> Minggui Teng<sup>2</sup> Yufei Han<sup>5</sup> Chao Xu<sup>1</sup> Boxin Shi<sup>2,3,4\*</sup>

<sup>1</sup>Key Lab of Machine Perception (MOE), Dept. of Machine Intelligence, Peking University

<sup>2</sup>Nat'l Eng. Lab for Video Technology, School of Computer Science, Peking University

<sup>3</sup>Institute for Artificial Intelligence, Peking University

<sup>4</sup>Beijing Academy of Artificial Intelligence

<sup>5</sup>School of Info. and Comm. Eng., Beijing University of Posts and Telecommunications

{zhou\_chu, minggui\_teng, shiboxin}@pku.edu.cn,

hanyufei@bupt.edu.cn, xuchao@cis.pku.edu.cn

## 7 Additional synthetic results

In this section, we provide additional comparisons on synthetic data among our method, a representative polarization-based dehazing algorithm SPCVE [4] which also takes three polarized images as the input, and five state-of-the-art learning-based dehazing methods including GDN [3], BPP [6], FFA [5], HardGAN [1], and MSBDN [2] which take a single hazy image as the input, as shown in Figure 7, Figure 8, and Figure 9, corresponding to Footnote 9 in Section 5.1 of the paper.

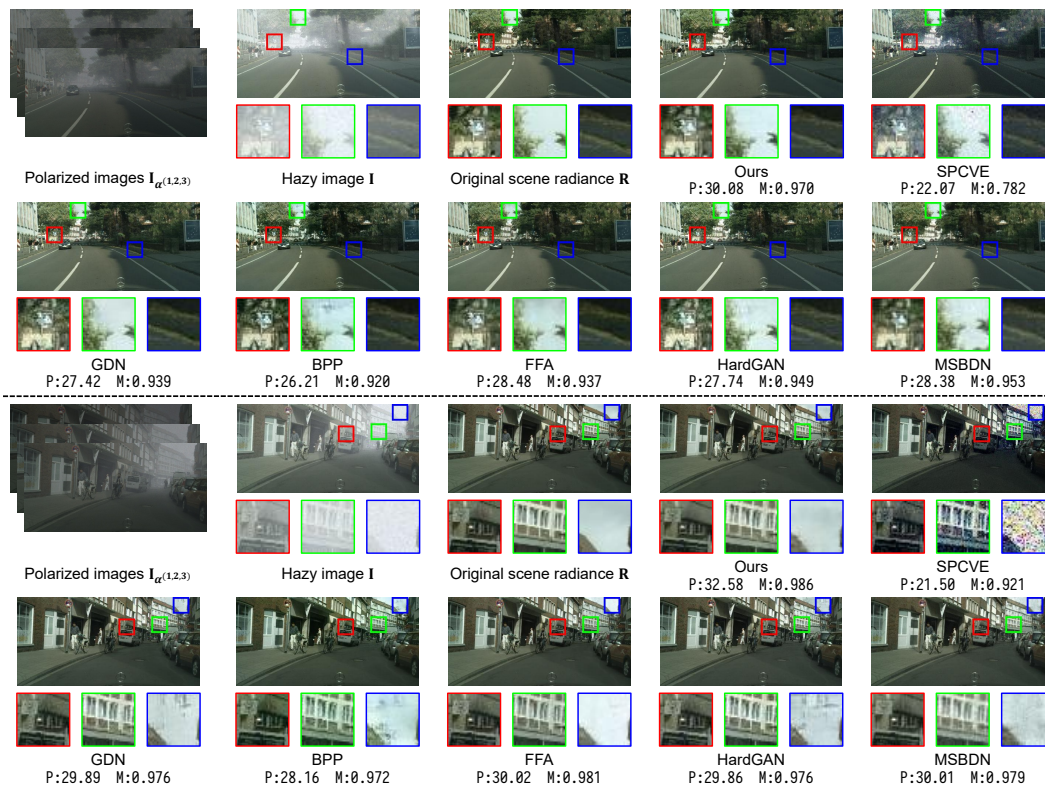

Figure 7: Additional comparisons on synthetic data (part 1). Quantitative results evaluated using PSNR (P) and MS-SSIM (M) are displayed below each image.

\*Corresponding author.

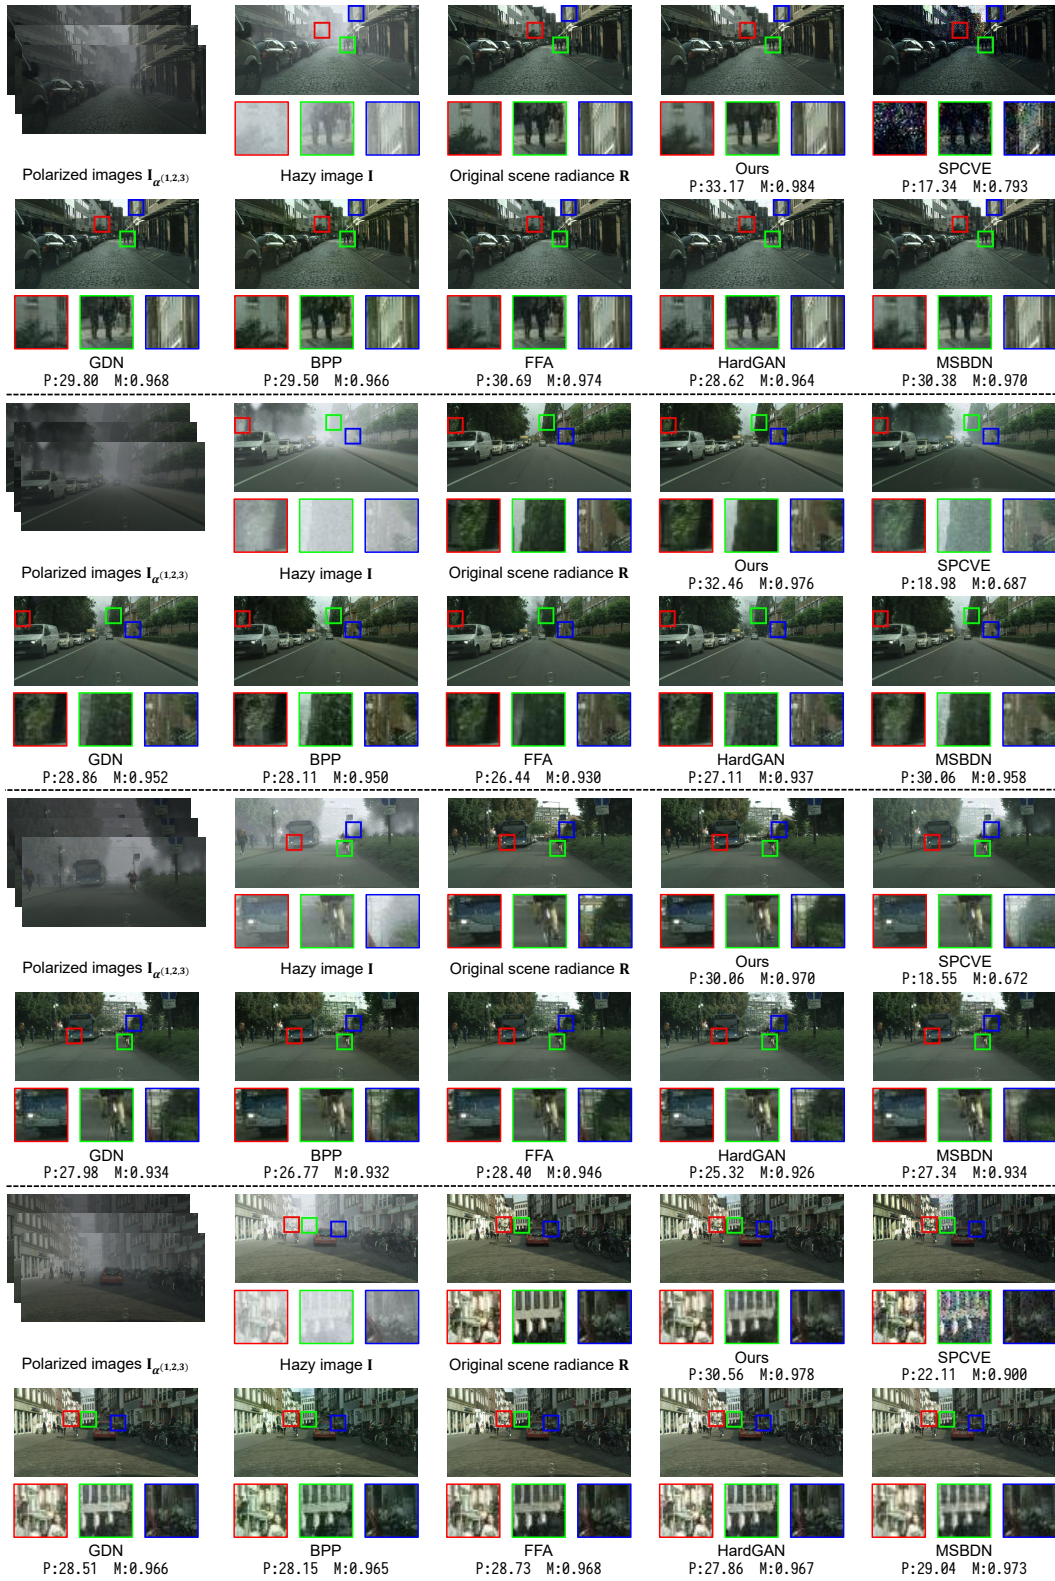

Figure 8: Additional comparisons on synthetic data (part 2). Quantitative results evaluated using PSNR (P) and MS-SSIM (M) are displayed below each image.

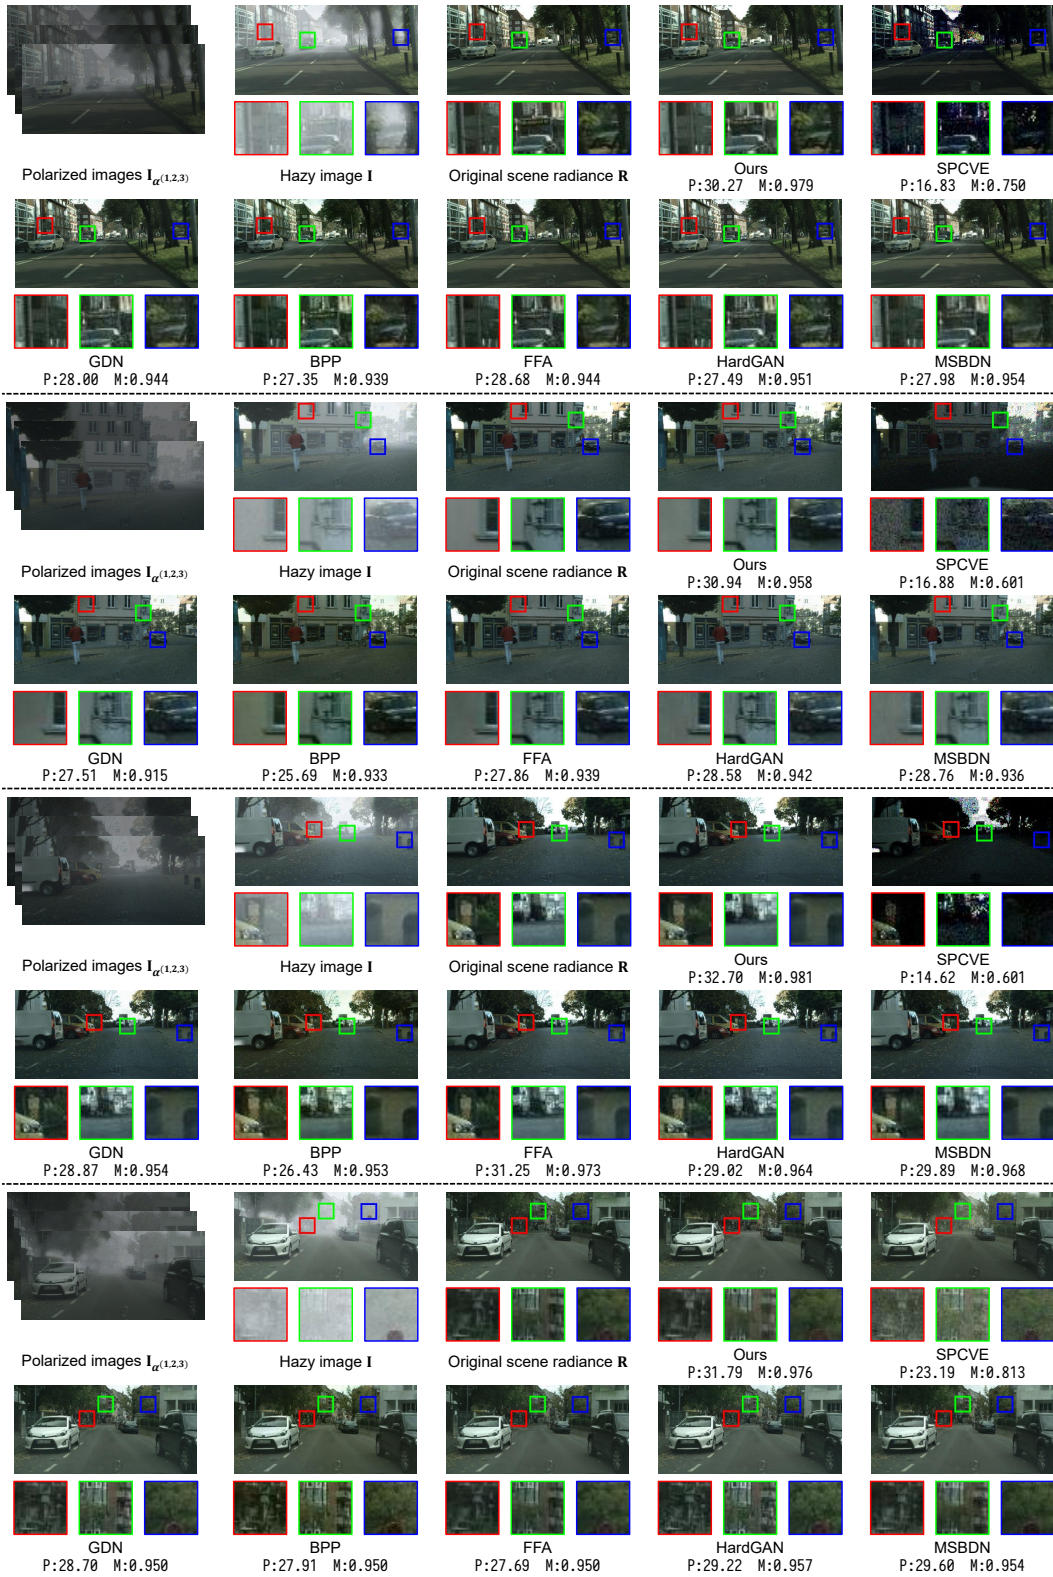

Figure 9: Additional comparisons on synthetic data (part 3). Quantitative results evaluated using PSNR (P) and MS-SSIM (M) are displayed below each image.

## 8 Additional real results

In this section, we provide additional qualitative comparisons on real data among our method, a representative polarization-based dehazing algorithm SPCVE [4] which also takes three polarized images as the input, and five state-of-the-art learning-based dehazing methods including GDN [3], BPP [6], FFA [5], HardGAN [1], and MSBDN [2] which take a single hazy image as the input, as shown in Figure 10, corresponding to Footnote 10 in Section 5.2 of the paper.

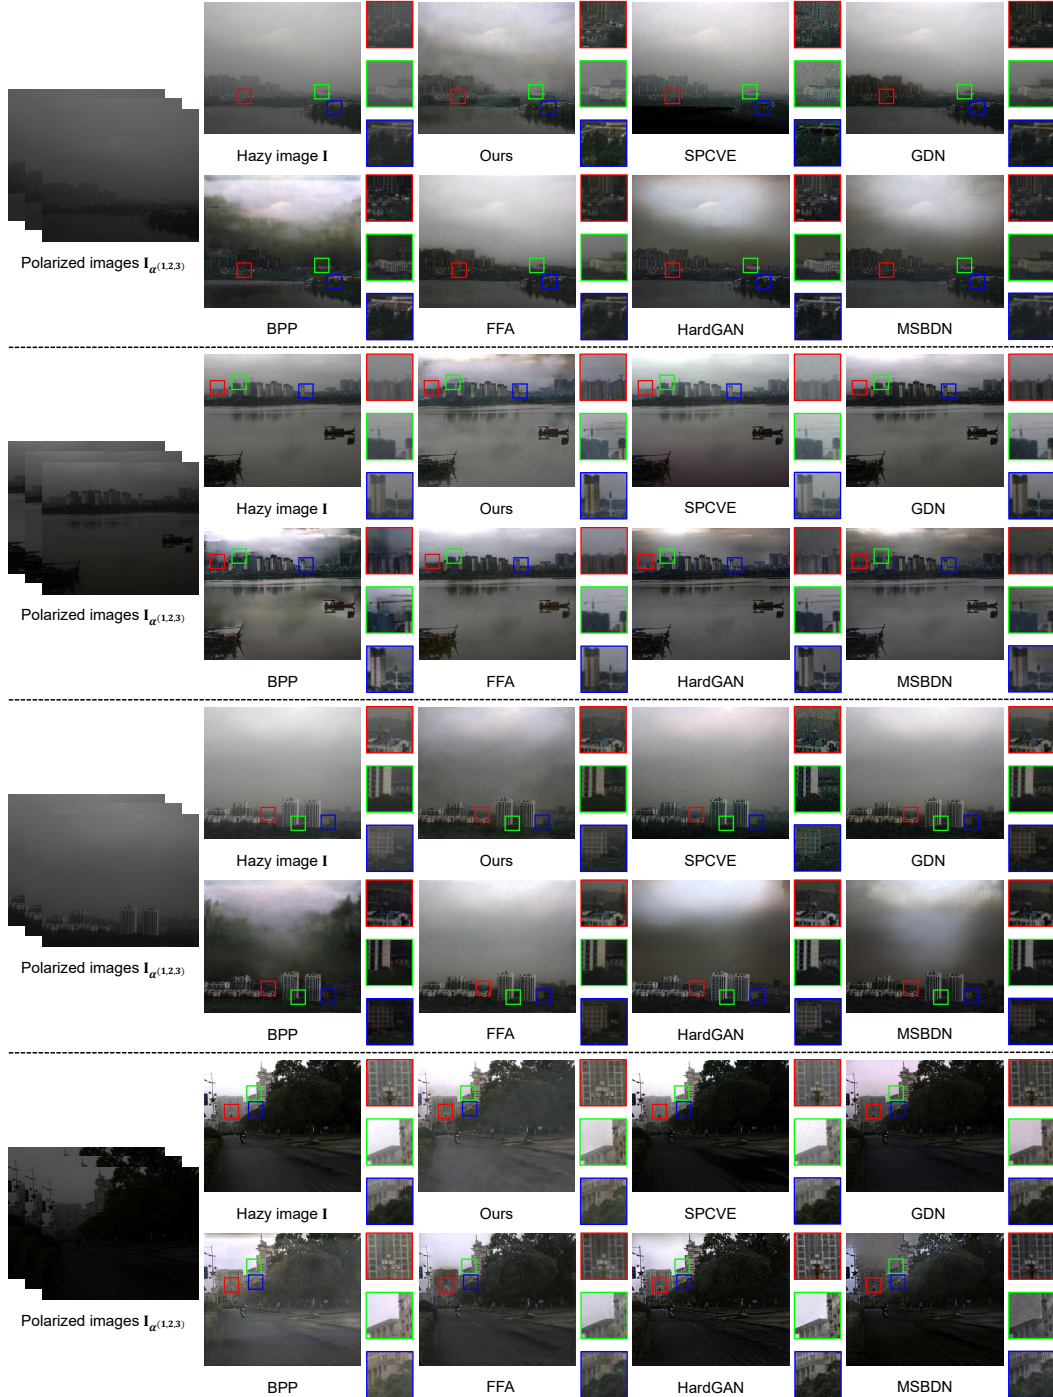

Figure 10: Additional qualitative comparisons on real data. All dehazing results are white-balanced to the similar color appearance and multiplied by a factor of 1.25 for better visualization.

## 9 Synthetic results without refinement

In this section, we provide qualitative comparisons on synthetic data without refinement (including the transmitted light  $\mathbf{T}$  and the original scene radiance  $\mathbf{R}$ ), as shown in Figure 11, corresponding to Footnote 11 in Section 5.3 of the paper.

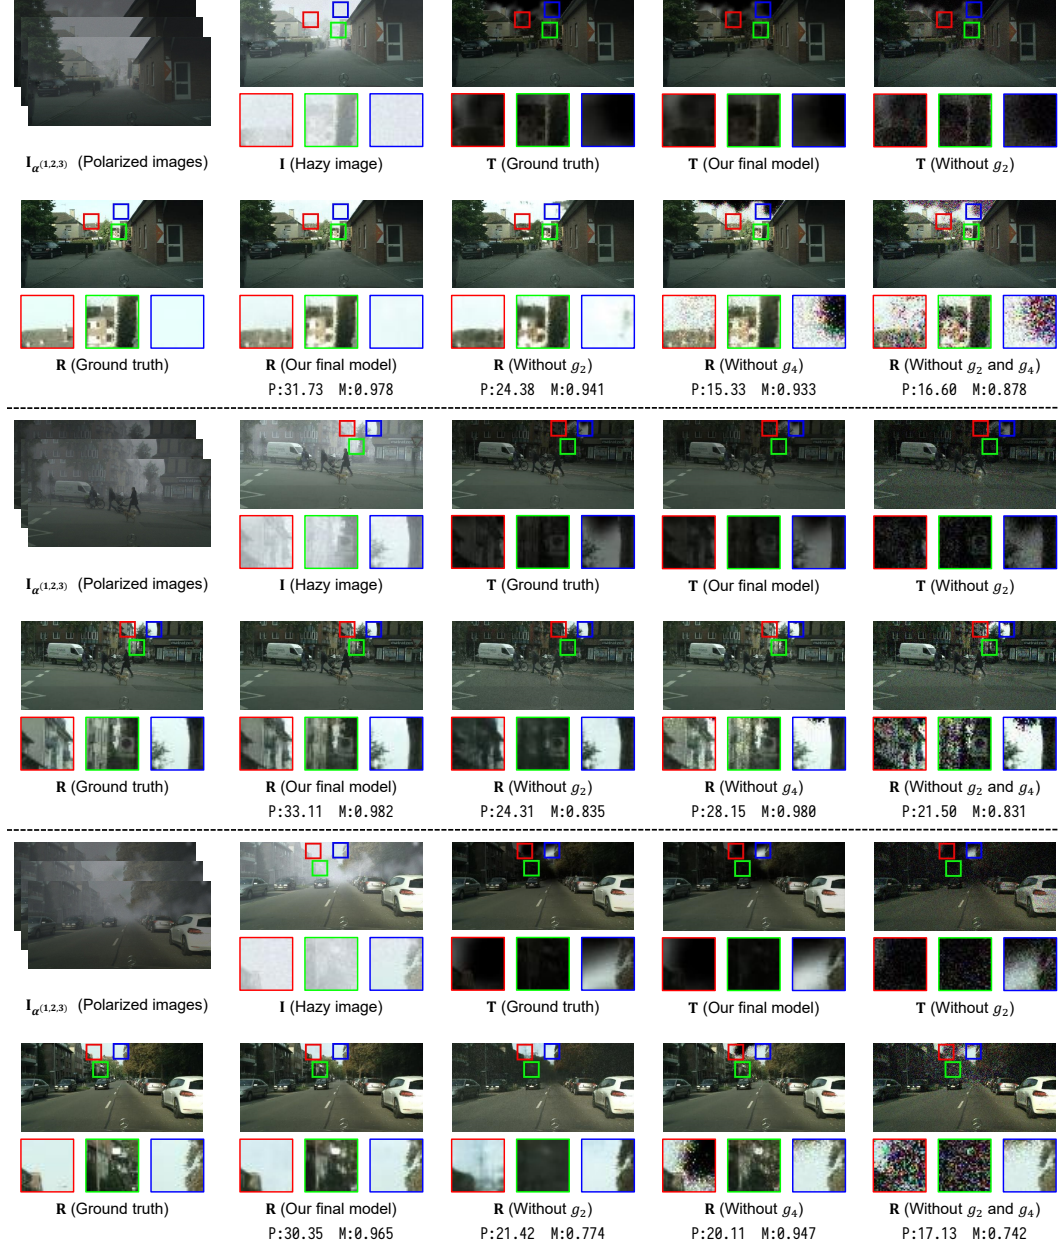

Figure 11: Qualitative comparisons on synthetic data without refinement (including the transmitted light  $\mathbf{T}$  and the original scene radiance  $\mathbf{R}$ ). Quantitative results evaluated using PSNR (P) and MS-SSIM (M) are displayed below each image.

## References

- [1] Qili Deng, Ziling Huang, Chung-Chi Tsai, and Chia-Wen Lin. HardGAN: A haze-aware representation distillation GAN for single image dehazing. In *Proc. of European Conference on Computer Vision*, pages 722–738, 2020.
- [2] Hang Dong, Jinshan Pan, Lei Xiang, Zhe Hu, Xinyi Zhang, Fei Wang, and Ming-Hsuan Yang. Multi-scale boosted dehazing network with dense feature fusion. In *Proc. of Computer Vision and Pattern Recognition*, pages 2157–2167, 2020.
- [3] Xiaohong Liu, Yongrui Ma, Zhihao Shi, and Jun Chen. GridDehazeNet: Attention-based multi-scale network for image dehazing. In *Proc. of International Conference on Computer Vision*, pages 7314–7323, 2019.
- [4] Einav Namer, Sarit Shwartz, and Yoav Y Schechner. Skyless polarimetric calibration and visibility enhancement. *Optics Express*, 17(2):472–493, 2009.
- [5] Xu Qin, Zhilin Wang, Yuanchao Bai, Xiaodong Xie, and Huizhu Jia. FFA-Net: Feature fusion attention network for single image dehazing. In *Proc. of the AAAI Conference on Artificial Intelligence*, pages 11908–11915, 2020.
- [6] Ayush Singh, Ajay Bhawe, and Dilip K Prasad. Single image dehazing for a variety of haze scenarios using back projected pyramid network. In *Proc. of European Conference on Computer Vision Workshops*, pages 166–181, 2020.
